# Supplementary material for: Supramolecular tailoring of protein–nanoparticle interactions using cucurbituril mediators
Source: Royal Society of Chemistry journal article supplement (doi:10.1039/c4cc01257g), 2014-01-01
Supplement: c4cc01257g1.pdf [file c4cc01257g1.pdf]

# Supramolecular Tailoring of Protein-Nanoparticle Interactions using Cucurbituril Mediators

Yi-Cheun Yeh, Subinoy Rana, Rubul Mout, Bo Yan, Felix S. Alfonso and Vincent M. Rotello

Department of Chemistry, University of Massachusetts, Amherst, MA 01003, USA

E-mail: rotello@chem.umass.edu

## Supporting Information

### Experimental section

#### Preparation of nanoparticles

Gold nanoparticles (AuNPs) protected with 1-pentanethiol (C5) and diaminohexane-terminated thiol ligands (DAH) were prepared following the reported procedure.<sup>1</sup> NPs functionalized with DAH moiety were prepared following the ligand exchange procedure.<sup>2</sup> In a typical reaction, 10 mg of C5 functionalized NP (NPC5) was first dissolved in 1 mL of dry dichloromethane (DCM). DAH ligands (10 mg for NP1 and 40 mg for NP2) were dissolved in 5 mL of organic solvent (DCM:MeOH (4:1 v/v)), and then added to the solution of NPC5. The reaction mixture was stirred at room temperature for 48 h. After 48 h, the organic solvent was evaporated and NPs were dissolved in MilliQ water. The aqueous solution of the NPs was purified by dialysis.

#### Cloning and expression of GFP

Genetic engineering manipulation and protein expression were done according to previously reported methods.<sup>3</sup> To construct pQE80-6xHis-GFP plasmid, GFP gene was PCR amplified and cloned from pET21-d EGFP plasmid into *Bam*HI and *Hind* III (downstream of 6xHis tag) restriction sites of pQE80 expression vector. To produce recombinant proteins, plasmid containing the respective gene was transformed into *Escherichia coli* BL21(DE3) strain. A transformed colony was picked up to grow small cultures in 50 mL 2xYT media at 37 °C for overnight. The following day, 15 mL of grown culture was inoculated into one liter 2xYT media and allowed to grow at 37 °C until OD reaches 0.6 by using UV-Vis spectroscopy. At this point, GFP expression was induced by adding isopropyl-b-D-thiogalactopyranoside (IPTG; 1 mM final concentration) at 25 °C. After 16 h of induction, the cells were harvested and the pellets were lysed using microfluidizer. His-tagged GFP were purified from the lysed supernatant using HisPur cobalt columns. The integrity and the expression of native protein were determined by a 12% SDS-PAGE gel and absorbance spectra.

#### Mass spectrometry instrumentation and conditions

Both laser desorption/ionization mass spectrometry (LDI-MS) and matrix assisted laser desorption/ionization mass spectrometry (MALDI-MS) were performed at positive mode on a Bruker Autoflex III time-of-flight mass spectrometer (Autoflex III). All mass spectra were acquired in reflection

mode. Operating conditions were as follows: ion source 1= 19.00 kV, ion source 2= 16.60 kV, lens voltage= 8.44 kV, reflector voltage= 20.00 kV, and reflector voltage 2= 9.69 kV. For the LDI-MS experiments, 2.5  $\mu$ L of NP solutions were applied to a metal sample target. After allowing it to dry, the LDI-MS analysis was performed. A saturated  $\alpha$ -CHCA stock solution was prepared in 70 % acetonitrile, 30 % H<sub>2</sub>O and 0.1 % trifluoroacetic acid for the MALDI-MS analyses. This stock solution was added an equal volume of analyte solutions of the NP-CB[7] complexes. 2.5  $\mu$ L of this mixture was applied to target and allowed it to dry before the MALDI-MS analysis was performed.

### **Fluorescence titration assays of GFP-NP and ADA-CB[7] complexation**

GFP-NP complexations were carried out in sodium phosphate buffer (5 mM, pH 7.4) using a 96-well plate. GFP (100 nM) was conjugated with various concentrations of NPs in a 96-well plate to produce a range of NP/GFP binding ratio from 0 to 1.6 (final volume for each well was 200  $\mu$ L). After 30 min of conjugation, the fluorescence endpoint was measured with an excitation wavelength of 475 nm and recorded the fluorescence wavelength of 510 nm using a Molecular Devices SpectraMax M5 microplate reader.

For the ADA-CB[7] complexation, GFP-NP1, GFP-NP1/50CB[7] and GFP-NP2/100CB[7] complexes were conjugated as described previously. After 30 min of conjugation, ADA was added to each well (final concentration of 100  $\mu$ M) for another 15 min before the fluorescence of GFP was measured.

### **NPTMA preparation**

TMA ligand was synthesized following the procedure reported.<sup>4</sup> The ligand exchange process was similar as the preparation of NP1, where 10 mg of NPC5 and 10 mg of TMA ligand were used in the reactions.

### **$\beta$ -galactosidase ( $\beta$ -gal) activity assay studies**

The  $\beta$ -galactosidase ( $\beta$ -gal) was purchased from Sigma-Aldrich and the colorogenic substrate chlorophenol-red- $\beta$ -D-galactopyranside (CPRG) was purchased from Roche Applied Science. In this study,  $\beta$ -gal, nanoparticle and CPRG solutions were prepared in sodium phosphate buffer solution (5 mM, pH 7.4). In the activity assay studies,  $\beta$ -gal (1 nM) was conjugated with various concentrations of NPs in a 96-well plate, and the final volume for each well was 200  $\mu$ L. After 30 min conjugation, CPRG was added for another 10 min (final concentration of CPRG was 1.5 mM). The enzymatic activity was followed by monitoring product formation at absorbance wavelength of 595 nm using a Molecular Devices SpectraMax M5 microplate reader.

### **Different chemical agents were used to interfere with the major interactions in the complexes**

GFP-NP and GFP-NP/CB[7] complexes were conjugated in a 96-wells plate for 30 min before the adding of different chemical reagents with different final concentrations (i.e., NaCl (400 mM), Tween-20 (1%) and urea (400 mM)). After incubation with the chemical agents for another 15 min, the fluorescence of GFP was measured and analyzed.

## Different proteins were used to investigate the selective interactions between particles and proteins

GFP-NP1 and GFP-NP1/50CB[7] complexes (GFP:NP = 1:1, 200  $\mu$ L) were conjugated in a 96-wells plate for 30 min before the addition of protein solutions (10  $\mu$ L of bovine serum albumin (BSA), lysozyme (Lys) or  $\beta$ -galactosidase ( $\beta$ -gal)), where the final concentration of the protein was 100 nM. After 30 min incubation with protein, the fluorescence of GFP was measured and analyzed.

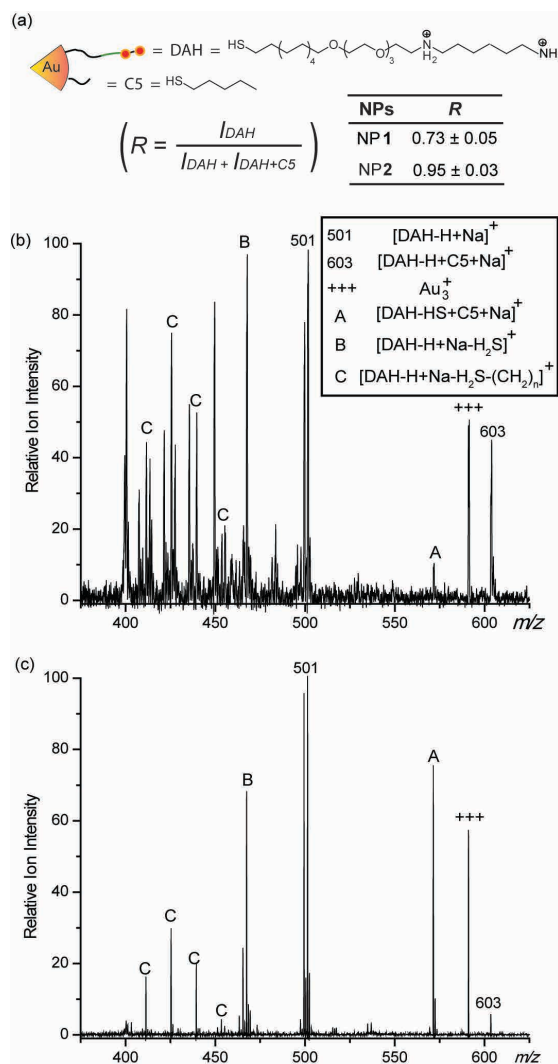

**Fig. S1** (a) Structure of a mixed monolayer-protected AuNP featuring pentanethiol (C5) and diaminohexane (DAH) terminated thiol ligand. (b) NP1 and (c) NP2 presented different coverages of DAH ligand based on the LDI mass spectra. In the LDI mass spectra,  $R$  value was defined as the peak intensity ratio of DAH ( $I_{DAH}$ , where  $M_{DAH}$  was  $m/z$  501, sodium adduct ion) to the sum of DAH ( $I_{DAH}$ ) and disulfide species DAH+C5 ( $I_{DAH+C5}$ , where  $M_{DAH+C5}$  was  $m/z$  603, sodium adduct ion). The spectral analysis showed that the coverage of DAH ligand on NP2 ( $R_{NP2} = 0.95 \pm 0.03$ ) was higher than that on NP1 ( $R_{NP1} = 0.73 \pm 0.05$ ).

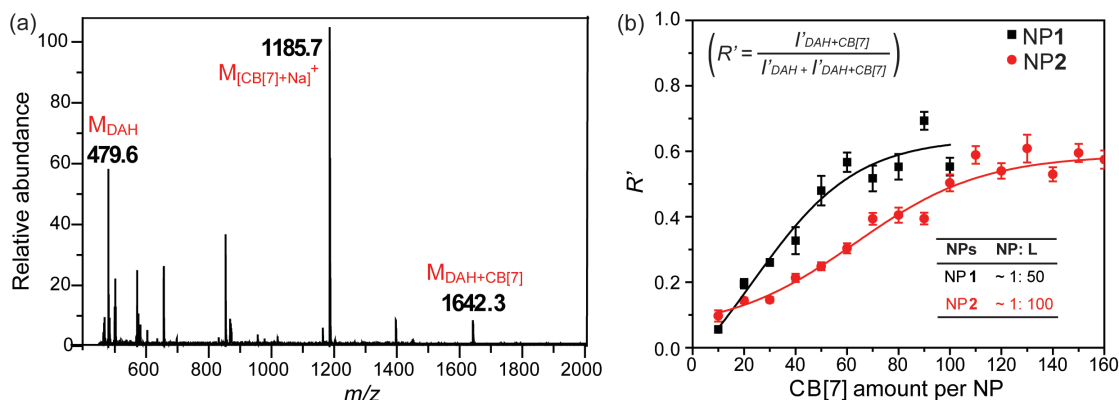

**Fig. S2** (a) A representative MALDI mass spectrum used for the calculation of CB[7] binding amounts on NP surface. The characteristic ion peaks of DAH ligand ( $M_{DAH}$   $m/z$  479) and DAH/CB[7] ligand ( $M_{DAH+CB[7]}$   $m/z$  1642) on NP surface are shown. (b) Mass spectrometric titration experiments were performed by adding different amounts of CB[7] to a fixed amount of NPs (final concentration of 2  $\mu$ M) to calculate the saturated CB[7] amount on each NP. The peak intensity ratio ( $R'$ ) of DAH+CB[7] ( $I'_{DAH+CB[7]}$ ) to the sum of DAH ( $I'_{DAH}$ ) and DAH+CB[7] ( $I'_{DAH+CB[7]}$ ) gradually increased upon addition of CB[7], indicating the continuous attachment of CB[7] to the terminal DAH ligands on NP surface in the titration process. The  $R'$  value reached a saturation at a CB[7] to NP ratio of ~50 and ~100 for NP1 and NP2, respectively.

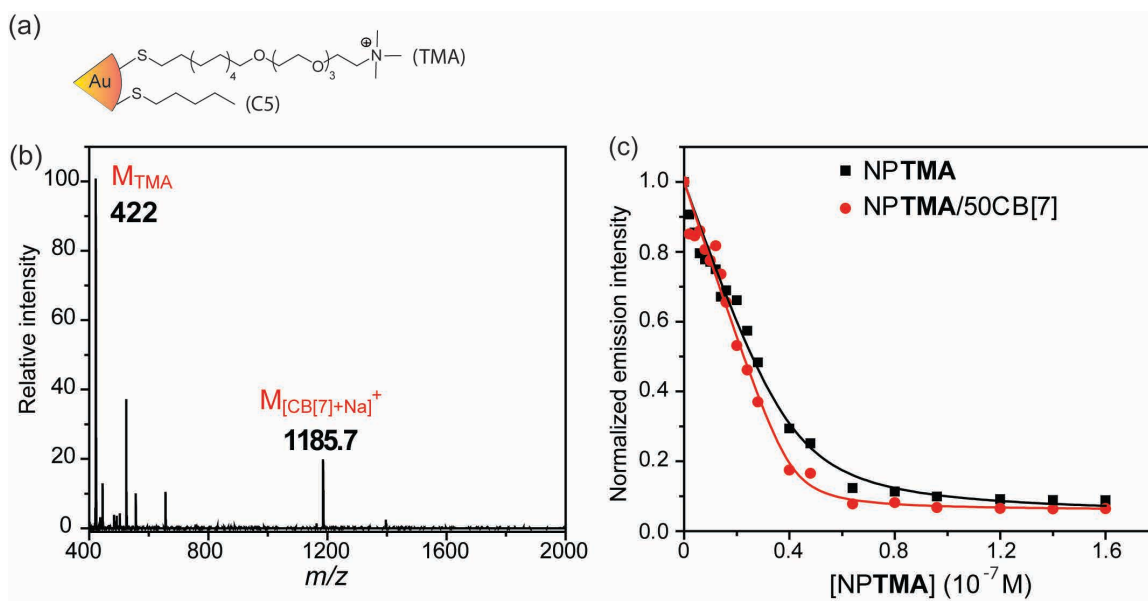

**Fig. S3** (a) Structure of NPTMA featuring mixed monolayers of pentanethiol (C5) and trimethylamine (TMA) terminated thiol ligand. (b) Mass spectra of NPTMA/50CB[7]. (c) GFP and NPTMA complexations in the absence and presence of CB[7].

## References

---

- 1 (a) M. Brust, M. Walker, D. Bethell, D. J. Schiffrin and R. Whyman, *J. Chem. Soc. Chem. Commun.*, 1994, **7**, 801; (b) C. Kim, S. S. Agasti, Z. Zhu, L. Isaacs and V. M. Rotello, *Nat. Chem.*, 2010, **2**, 962.
- 2 A. C. Templeton, M. P. Wueling and R. W. Murray, *Acc. Chem. Res.*, 2000, **33**, 27.
- 3 V. Nandwana, R. Mout, Y.-C. Yeh, S. Dickert, M. T. Tuominen and V. M. Rotello, *J. Inorg. Organomet. Polym. Mater.*, 2013, **23**, 227.
- 4 C. C. You, O. R. Miranda, B. Gider, P. S. Ghosh, I. B. Kim, B. Erdogan, S. A. Krovi, U. H. F. Bunz and V. M. Rotello, *Nat. Nanotechnol.*, 2007, **2**, 318.
